# Supplementary material for: A Novel Role of Growth Differentiation Factor (GDF)-15 in Overlap with Sedentary Lifestyle and Cognitive Risk in COPD
Source: MDPI journal article supplement (doi:10.3390/jcm9092737), 2020-08-24
Supplement: s1 [file s1]

**Supplemental Table S1.** Association of age and EX, MoCA-J and GDF-15

|        | All subjects |         |              |         | COPD       |         |              |         |
|--------|--------------|---------|--------------|---------|------------|---------|--------------|---------|
|        | univariate   |         | multivariate |         | univariate |         | multivariate |         |
|        | ρ            | P-value | F            | P-value | ρ          | P-value | F            | P-value |
| EX     | -0.49        | <0.0001 | 0.9          | n.s.    | -0.40      | <0.05   | 0.0          | n.s.    |
| MoCA-J | -0.69        | <0.0001 | 19.8         | <0.0001 | -0.60      | <0.001  | 4.1          | 0.05    |
| GDF-15 | 0.50         | <0.0001 | 5.6          | <0.05   | 0.47       | <0.05   | 4.9          | <0.05   |

ρ means spearman's rank correlation coefficient, F means F-statistic by least square method
